# Supplementary material for: The Role of ZIP9 and Androgen Receptor in the Establishment of Tight Junctions between Adult Rat Sertoli Cells
Source: MDPI journal article supplement (doi:10.3390/biology11050668), 2022-04-26
Supplement: s1 [file s1]

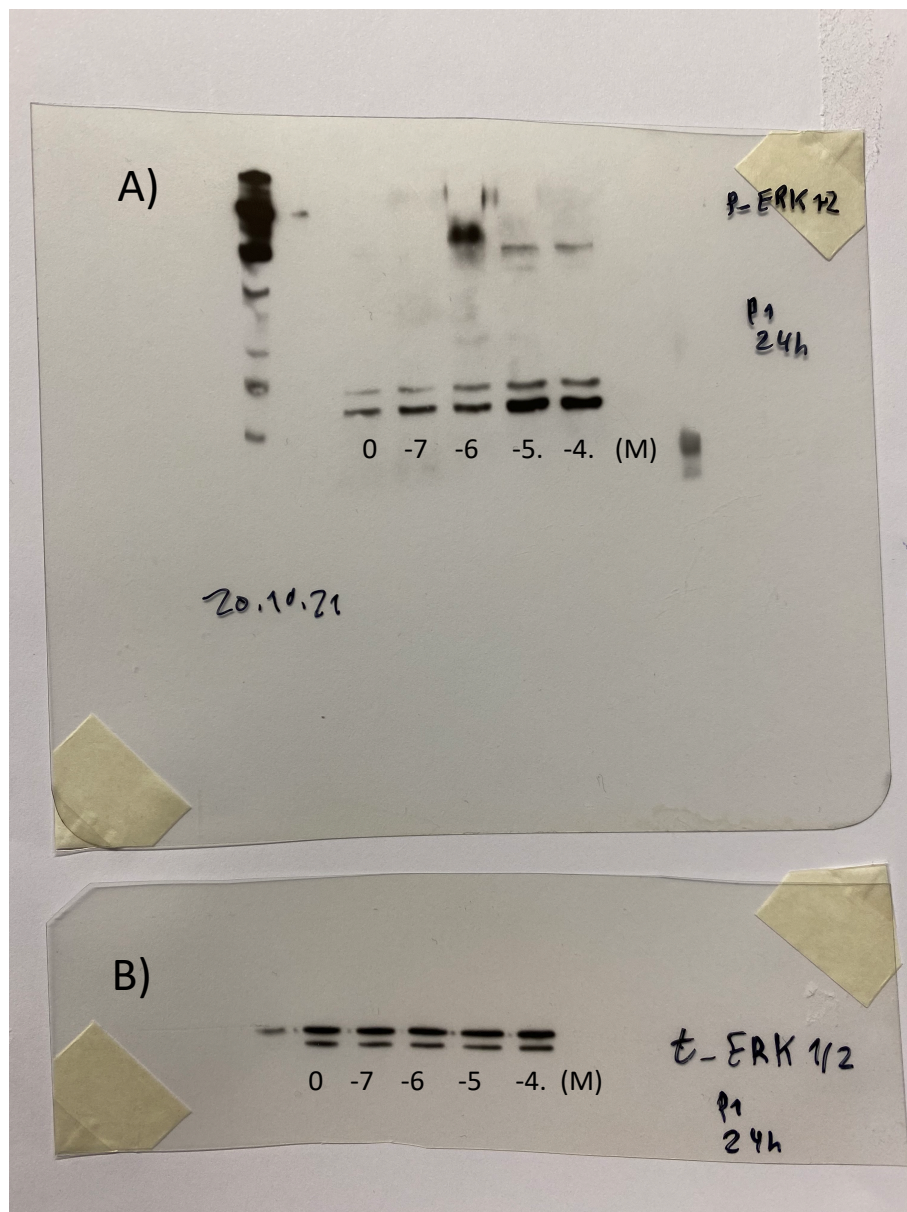

Figure S1: **A)** activation of Erk1/2 phosphorylation by the IAPG peptide. **B)** Total Erk1/2

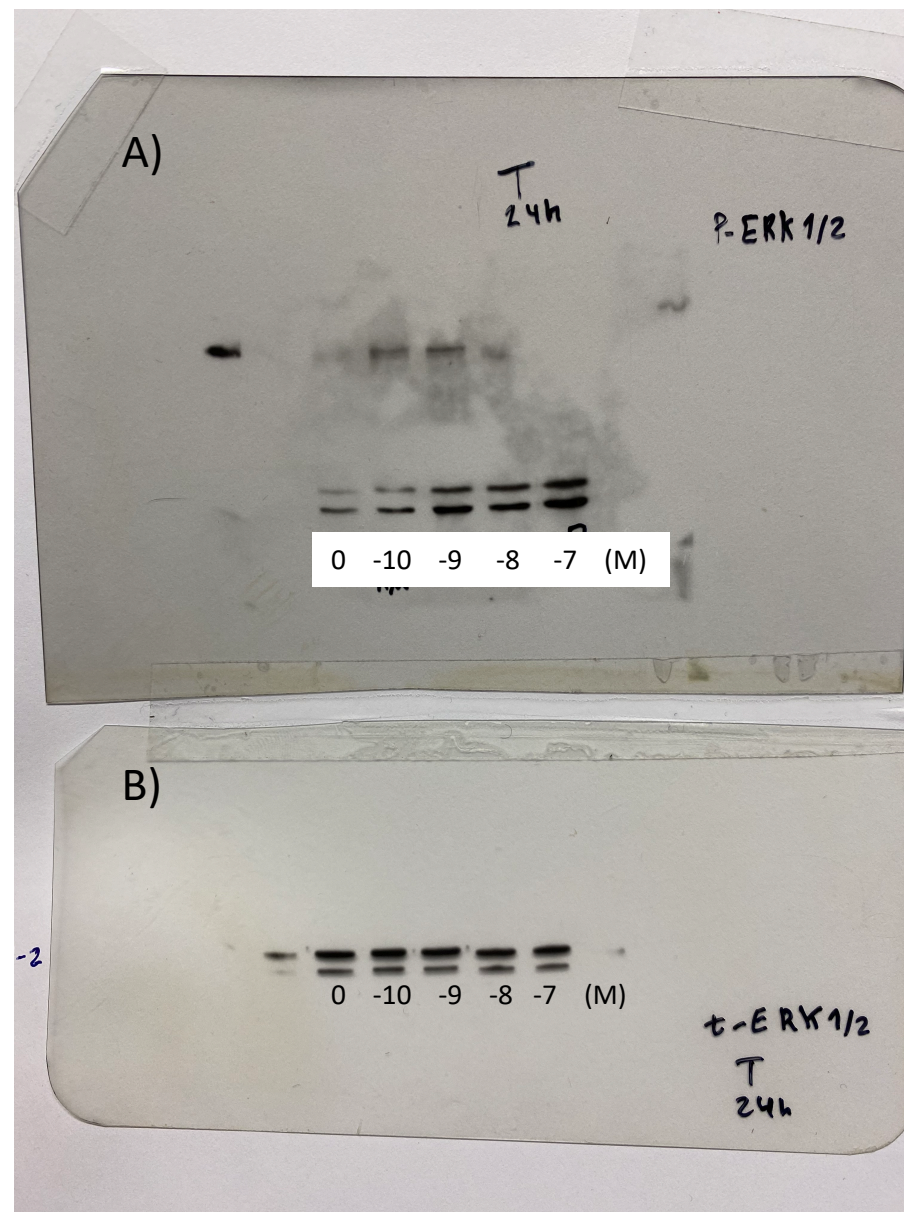

Figure S2: **A)** activation of Erk1/2 phosphorylation by testosterone. **B)** Total Erk1/2
